# Supplementary material
Source: PubMed Central journal article supplement (PMC3286133)

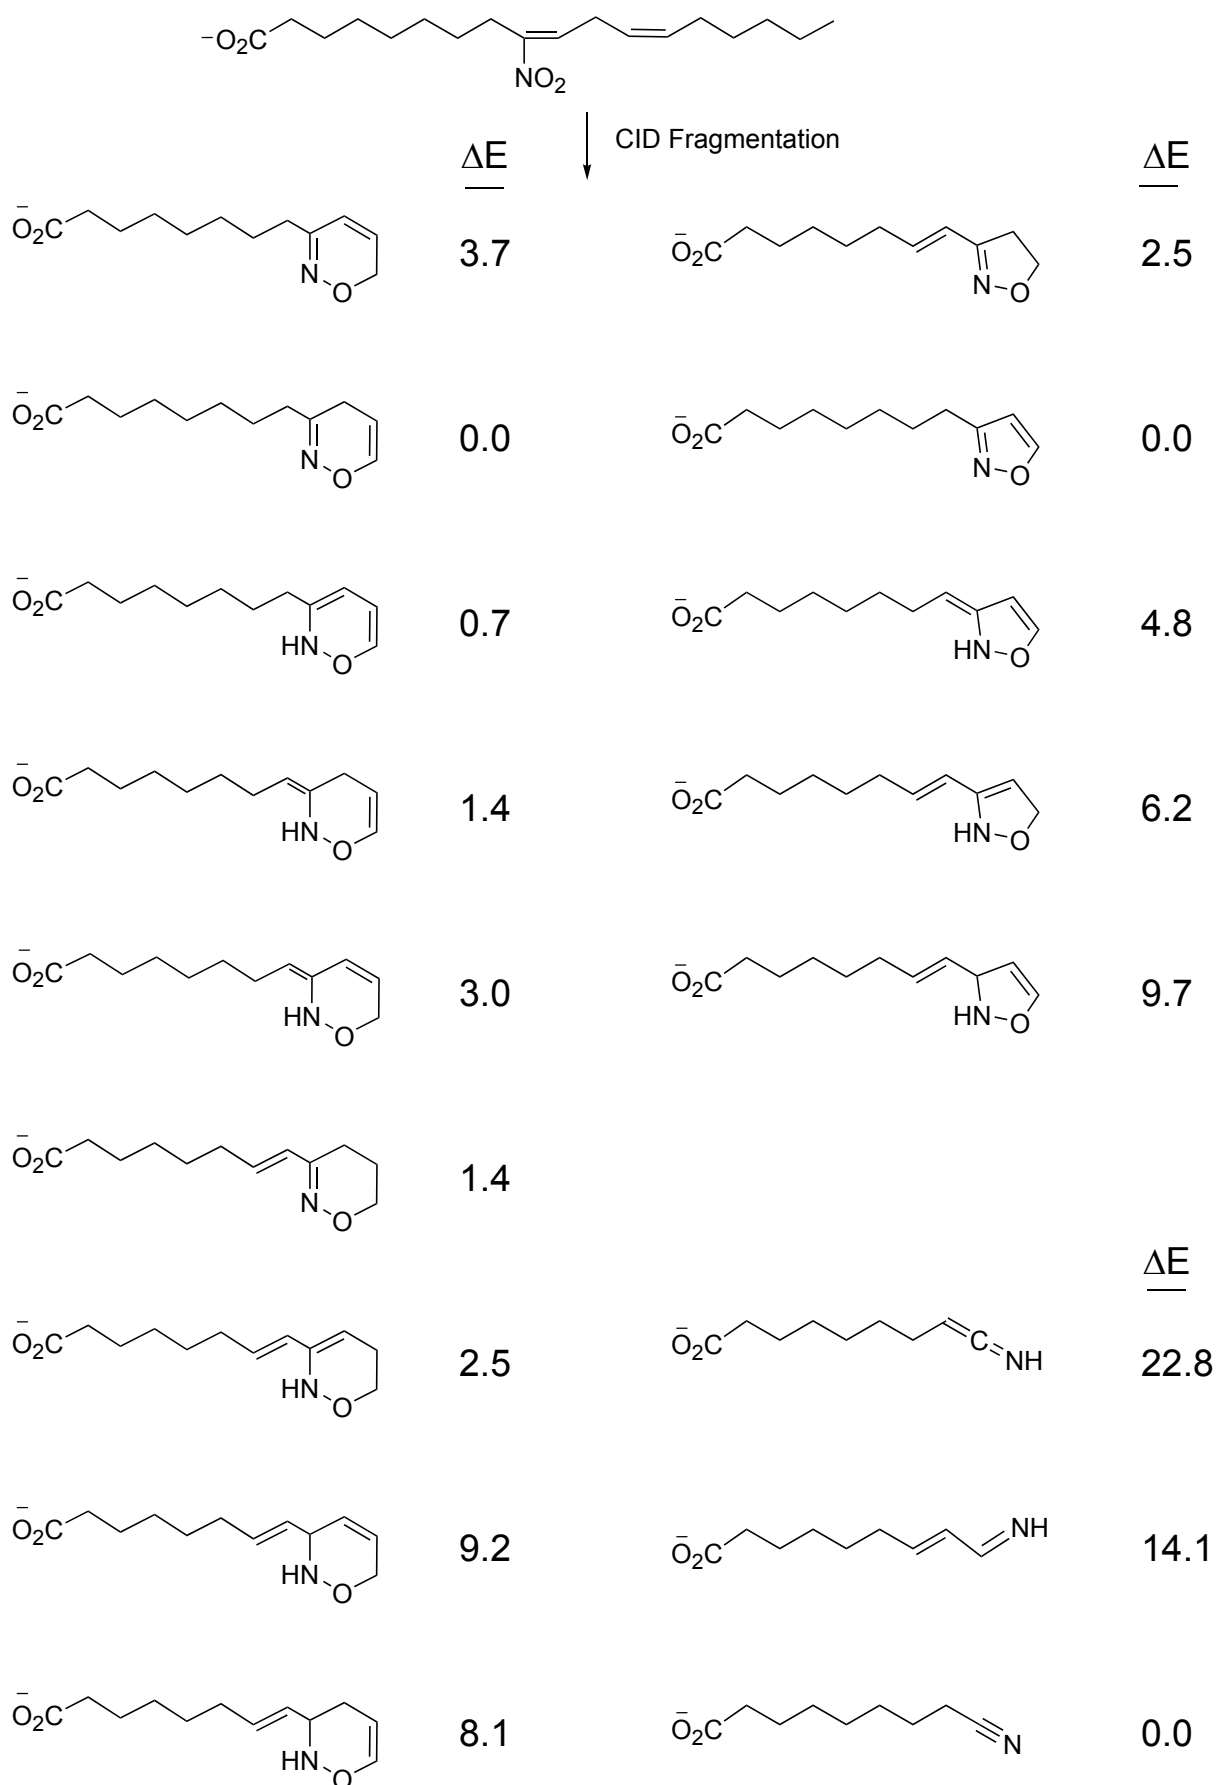

Supplementary Scheme 1 Bonacci et al.

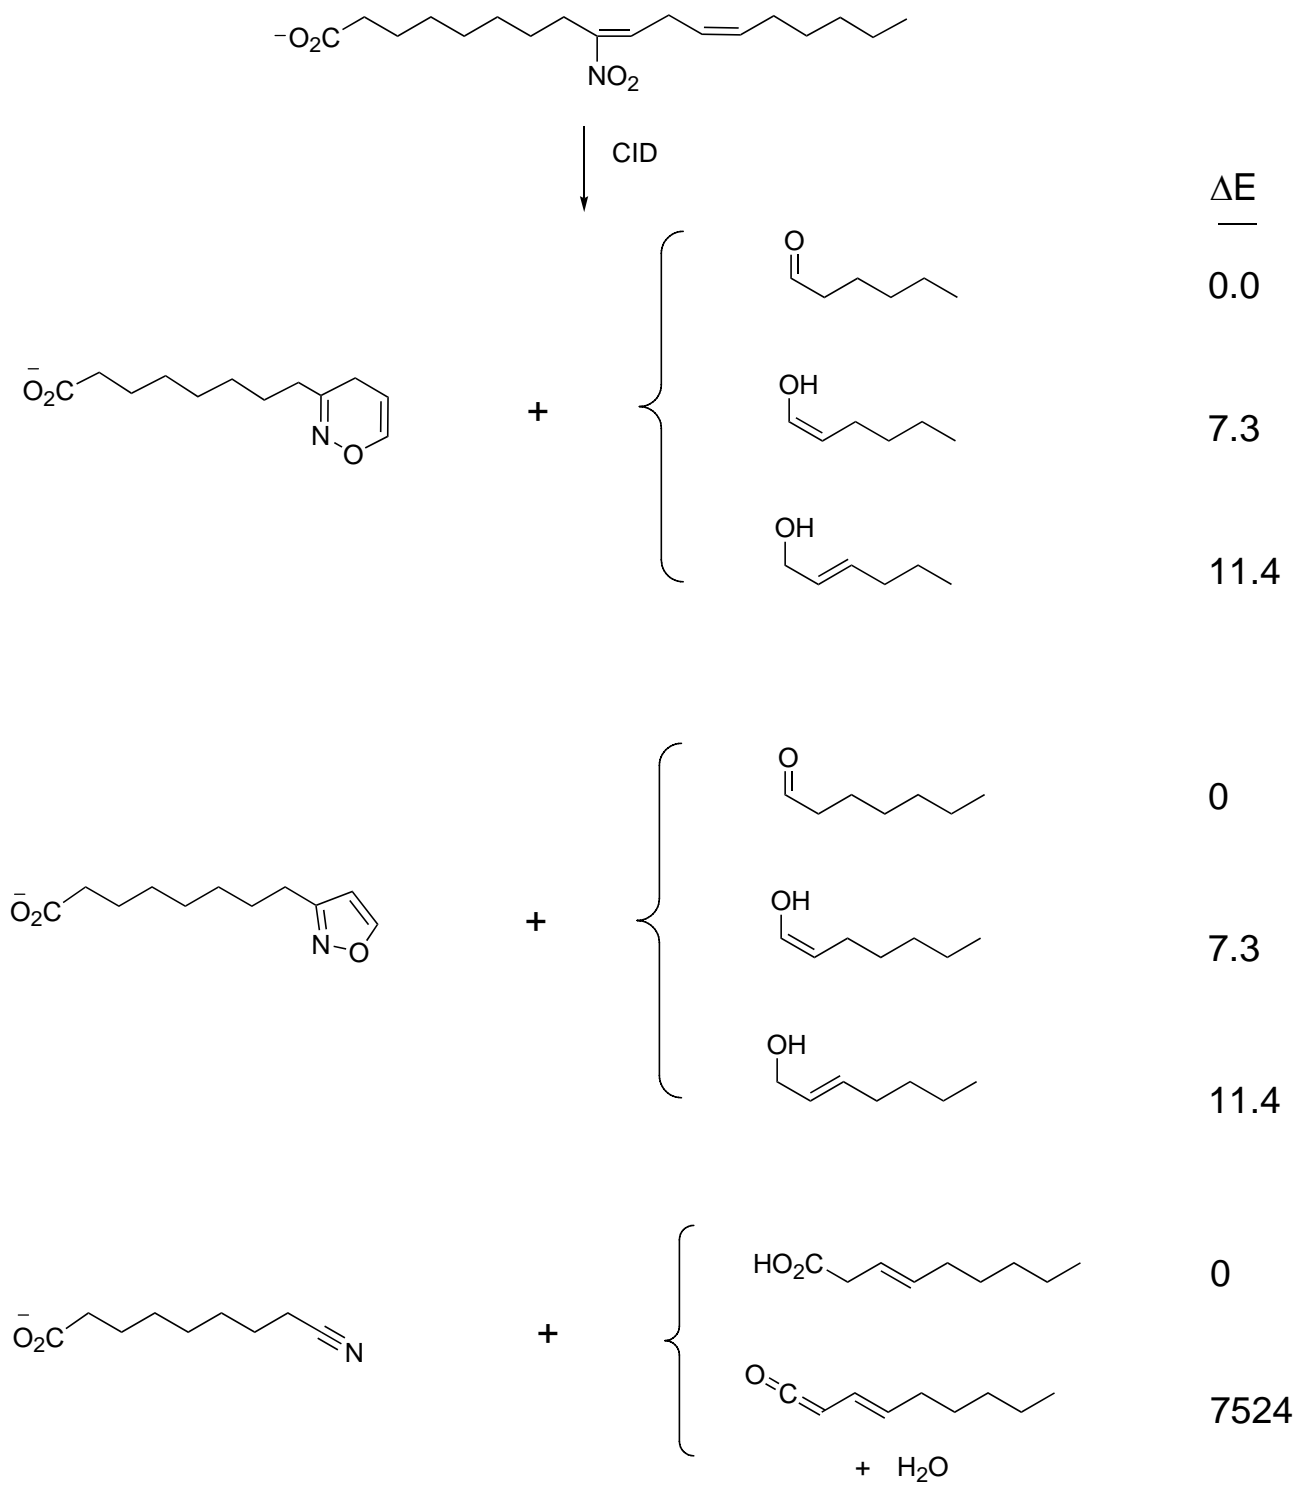

Supplementary Scheme 2 Bonacci et al.

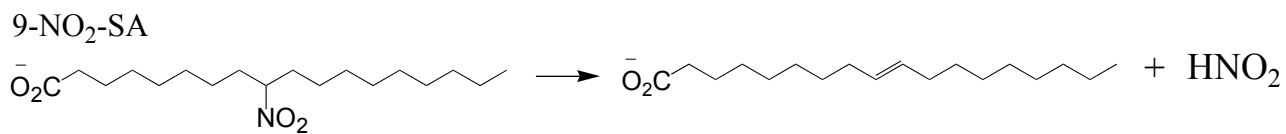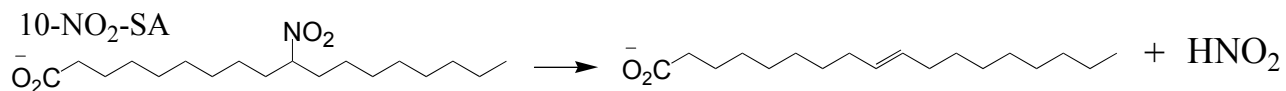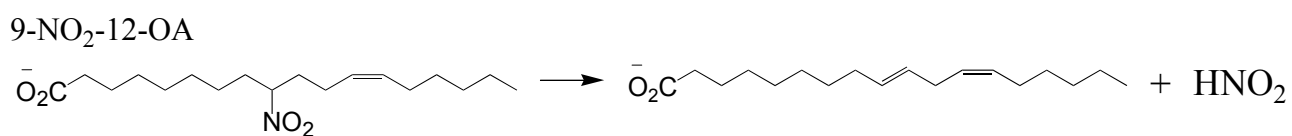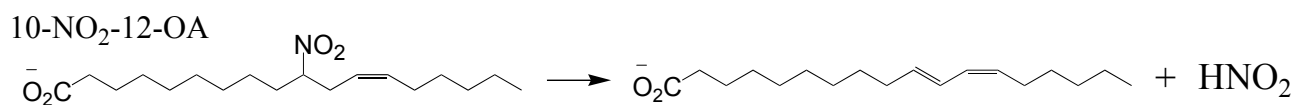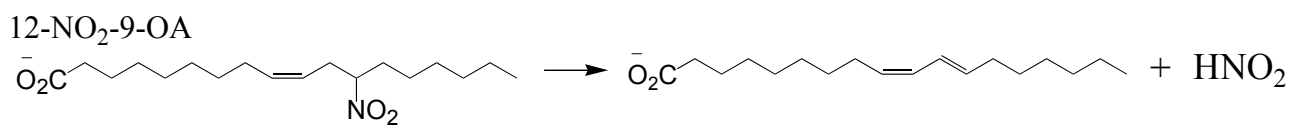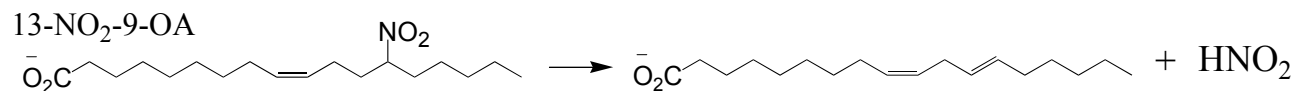

Supplement: NIHMS356071-supplement-SupplFigures_pdf.pdf [file NIHMS356071-supplement-SupplFigures_pdf.pdf]
